# Supplementary material for: Electrochemical sensing of nitrite using a copper–titanium oxide composite derived from a hexanuclear complex
Source: Royal Society of Chemistry journal article supplement (doi:10.1039/c6ra00104a), 2016-01-01
Supplement: c6ra00104a1.pdf [file c6ra00104a1.pdf]

## **Electronic Supporting Information**

### **Electrochemical Sensing of Nitrite using Copper-Titanium Oxide**

#### **Composite Derived from Hexanuclear Complex**

Muhammad Ali Ehsan, Rabia Naeem, Vickie McKee, Abbas Hakeem Saeed, Alagarsamy Pandikumar, Nay Ming Huang, Muhammad Mazhar,

| <b>List of Information</b>                                                                                                                                  | <b>Page No.</b> |
|-------------------------------------------------------------------------------------------------------------------------------------------------------------|-----------------|
| 1. ATR-FTIR spectrum of complex (1)                                                                                                                         | 2               |
| 2. SEM images of CuO-2TiO <sub>2</sub> composite thin films                                                                                                 | 3               |
| 3. EDX spectra of CuO-2TiO <sub>2</sub> composite thin films                                                                                                | 4-5             |
| 4. EDX Elemental map                                                                                                                                        | 6               |
| 5. X-ray Crystallography of [Cu <sub>2</sub> Ti <sub>4</sub> (O) <sub>2</sub> (OH) <sub>4</sub> (CF <sub>3</sub> COO) <sub>8</sub> (THF) <sub>6</sub> ]·THF | 7-22            |

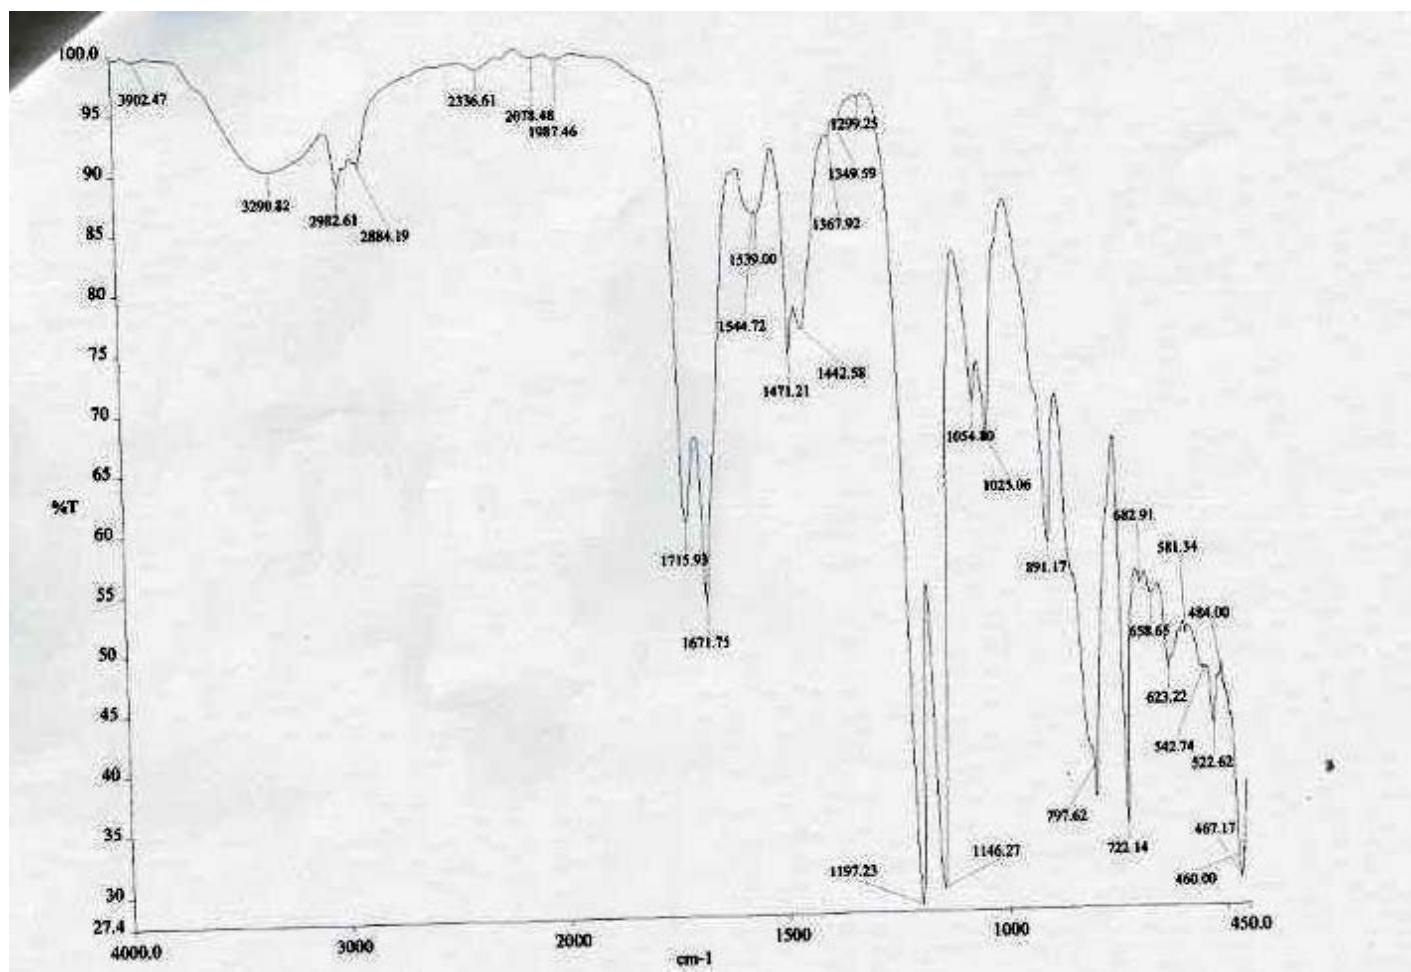

SI. Figure 1: ATR-FTIR spectrum of complex  $[\text{Cu}_2\text{Ti}_4(\text{O})_2(\text{OH})_4(\text{TFA})_8(\text{THF})_6] \cdot \text{THF}$  (1)

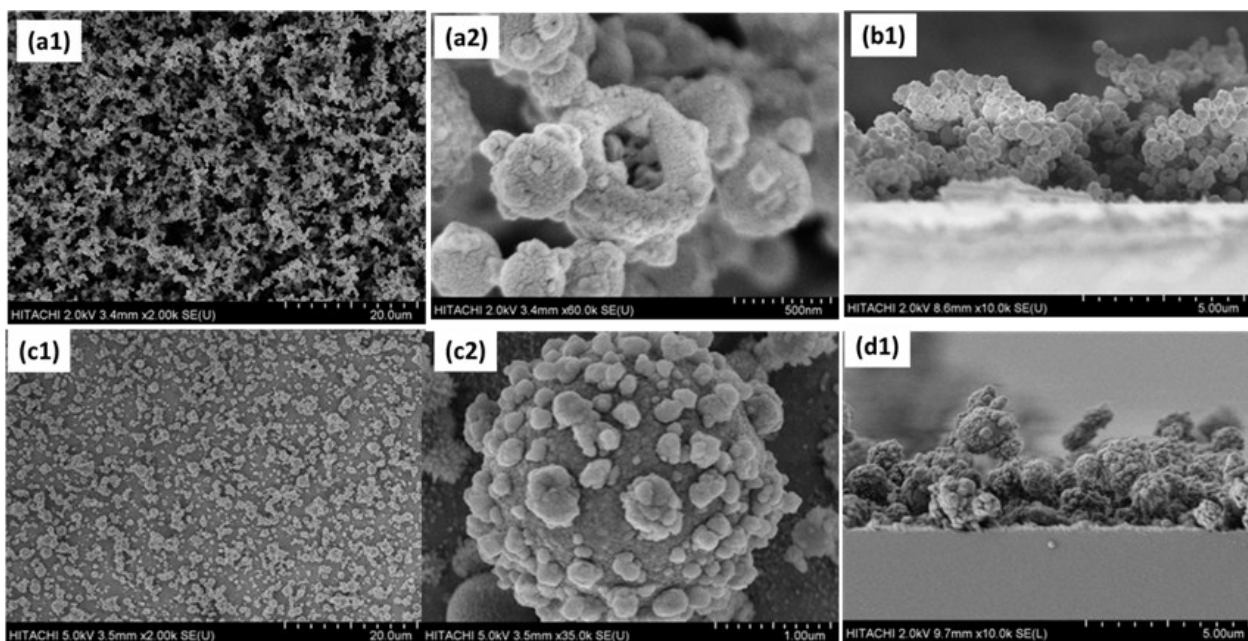

**SI. Figure 2:** (a1), (a2), (c1) and (c2) show surface ; (b1) and (d1) indicate the cross section SEM images of CuO-2TiO<sub>2</sub> composite thin films deposited on FTO glass substrate at 550 °C from solution of precursor (1) in (a, b) ethanol and (c, d) methanol and respectively.

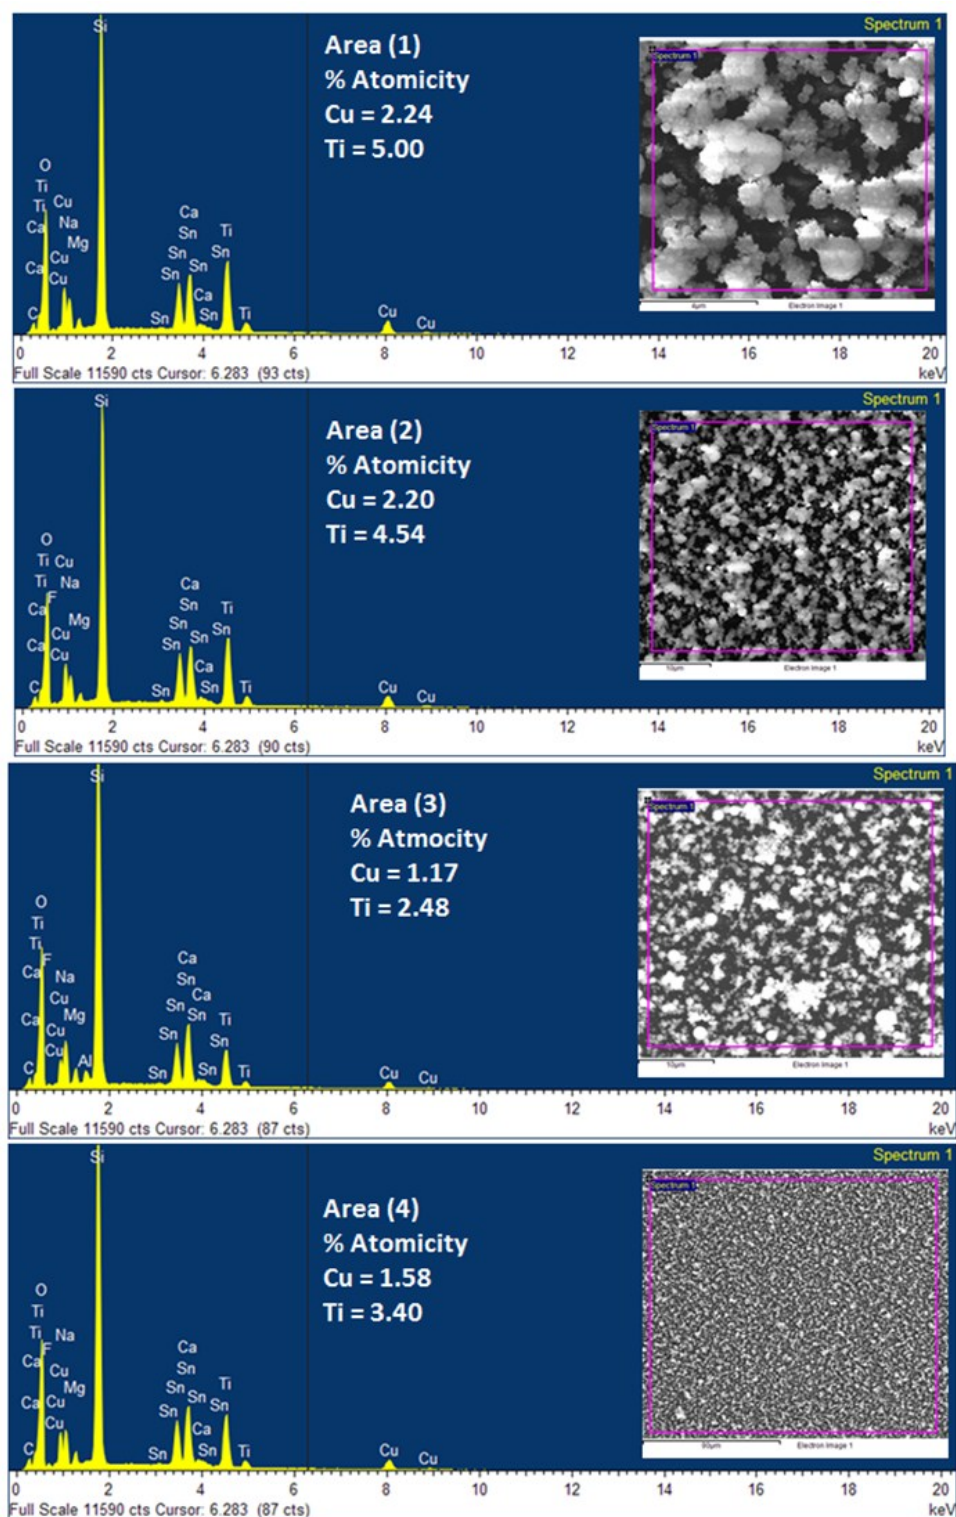

**SI. Figure 3a:** EDX spectrum recorded from different areas of CuO-2TiO<sub>2</sub> composite oxide film deposited from methanol solution of (1) on FTO substrate at 550 °C in air atmosphere.

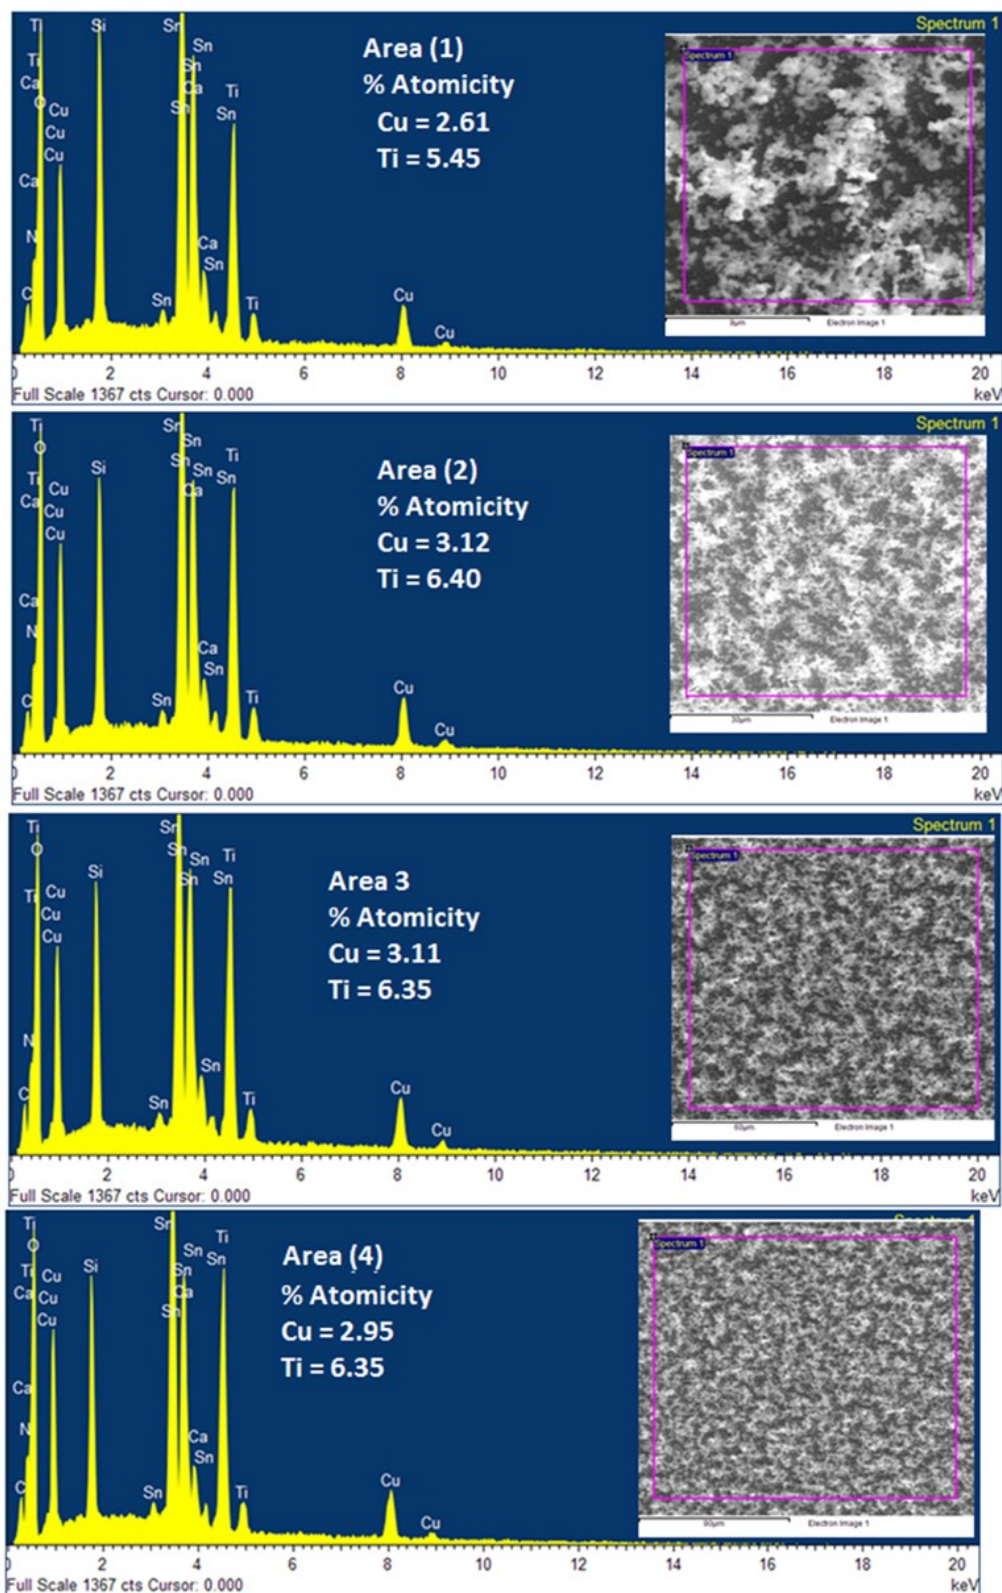

**SI. Figure 3b:** EDX spectrum recorded from different areas of CuO-2TiO<sub>2</sub> composite oxide film deposited from ethanol solution of (1) on FTO substrate at 550 °C in air atmosphere.

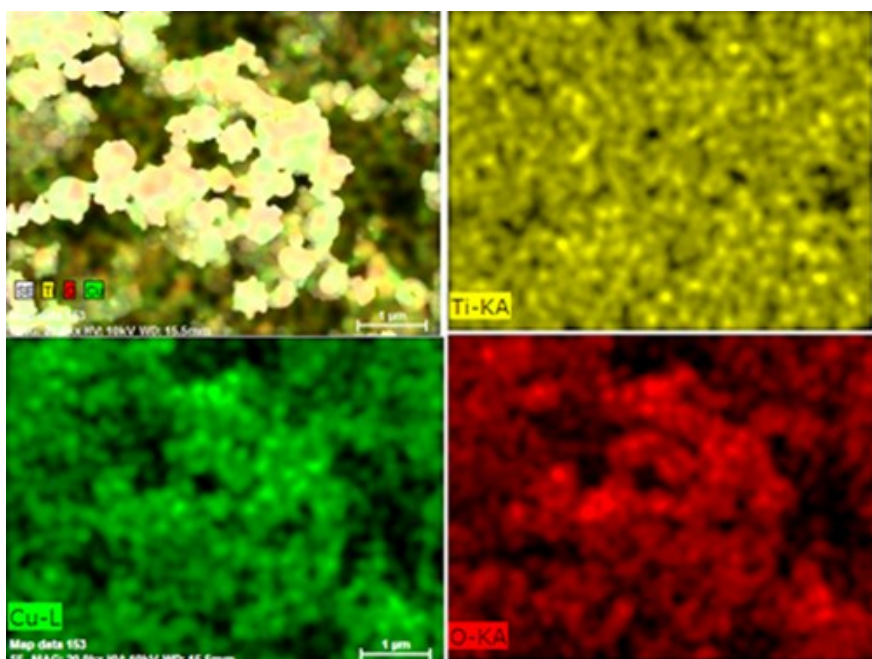

**SI. Figure 4a:** EDX Elemental map showing the distribution of Cu, Ti and O atoms in CuO–2TiO<sub>2</sub> composite thin film deposited from ethanol solution of precursor (1).

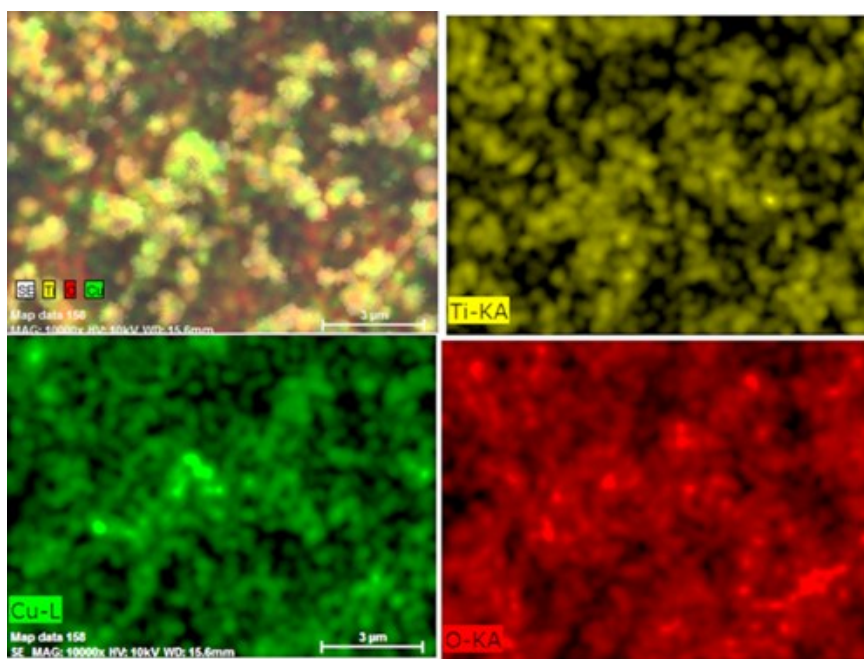

**SI. Figure 4b:** EDX Elemental map showing distribution of Cu, Ti and O atoms in CuO–2TiO<sub>2</sub> composite thin film deposited from methanol solution of precursor (1).

## X-ray Crystallography of $[\text{Cu}_2\text{Ti}_4(\text{O})_2(\text{OH})_4(\text{CF}_3\text{COO})_8(\text{THF})_6]\cdot\text{THF}$ (1)

The structure was refined in space group  $Pbca$  with a disorder about the centre of symmetry which was not reduced by reducing the symmetry of the system to  $Pca2_1$  or  $P2_12_12_1$ .

The core of the molecule consists of a tetrahedron of Ti(II) ions. Each edge of the tetrahedron is bridged by an oxygen atom, generating a  $\text{Ti}_4\text{O}_6$  adamantane cage. Four of the bridging species are hydroxo ions; the remaining two are oxo ions which are also coordinated to Cu(II) ions. The disorder arises from Ti ions occupying alternative sites, generating an overlapping adamantane with the oxygen atoms in the same positions.

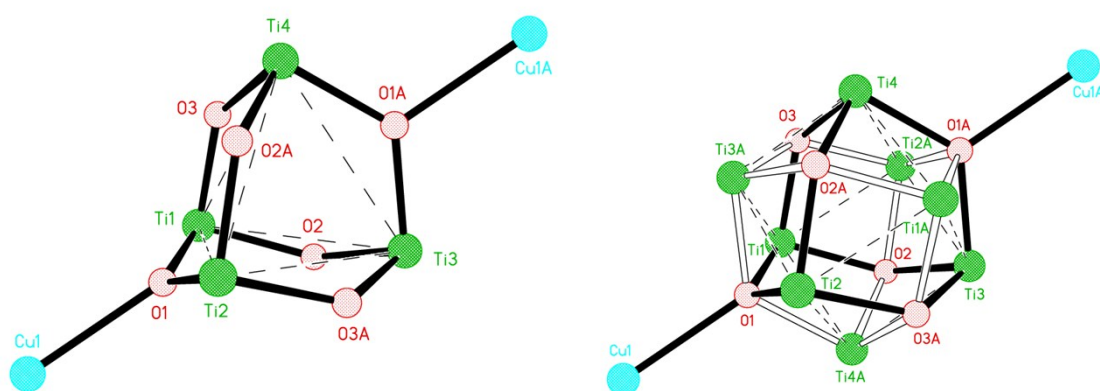

**SI. Figure 5:** Left  $\text{Cu}_2\text{Ti}_4\text{O}_6$  adamantane core, lines show the “tetrahedron” of Ti ions; right core showing disorder of the Ti ions, dashed lines show the “cube” of 50% occupancy Ti ions.

Four trifluoroacetate ions are bonded to each copper ion, each bridging to a titanium ion. All of the metal ions are six-coordinate, the last binding site being filled by one THF ligand for each metal ion. There is also a (disordered) non-coordinated THF solvate molecule in the lattice.

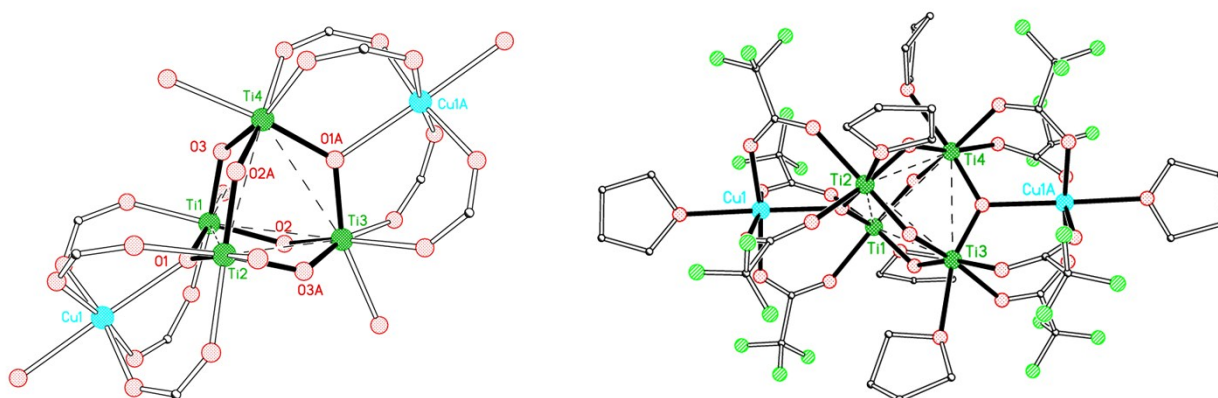

**SI. Figure 6:** Core of the  $[\text{Cu}_2\text{Ti}_4(\text{O})_2(\text{OH})_4(\text{CF}_3\text{COO})_8(\text{THF})_6]$  molecule.  $\text{CF}_3\text{COO}^-$  ions are

represented by OCO links; THF molecules by terminal O atoms. Bold bonds highlight the  $Ti_4O_2(OH)_4$  adamantane core; right complete molecule, disorder and H atoms omitted for clarity.

The copper, hydroxo and oxo ions are refined with full occupancy. The carbon atoms of the THF molecule coordinated to copper and those coordinated to Ti3 and Ti4 were disordered and were refined with equal occupancy of two overlapping positions. The titanium ions and their  $CF_3COO^-$  and

THF ligands are disordered about the centre of symmetry and were refined with 50% occupancy.

The extensive disorder results in a low data:parameter ratio in the refinement.

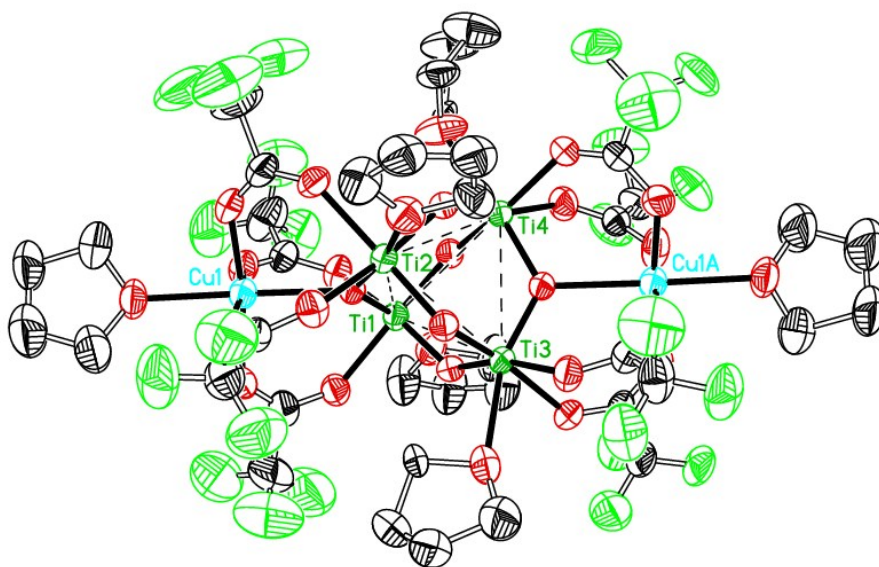

**SI. Figure 7:**  $[Cu_2Ti_4(O)_2(OH)_4(CF_3COO)_8(THF)_6]$  molecule 50% displacement ellipsoids. Disorder and H-atoms omitted for clarity, dashed lines highlight the  $Ti_4$  tetrahedron.



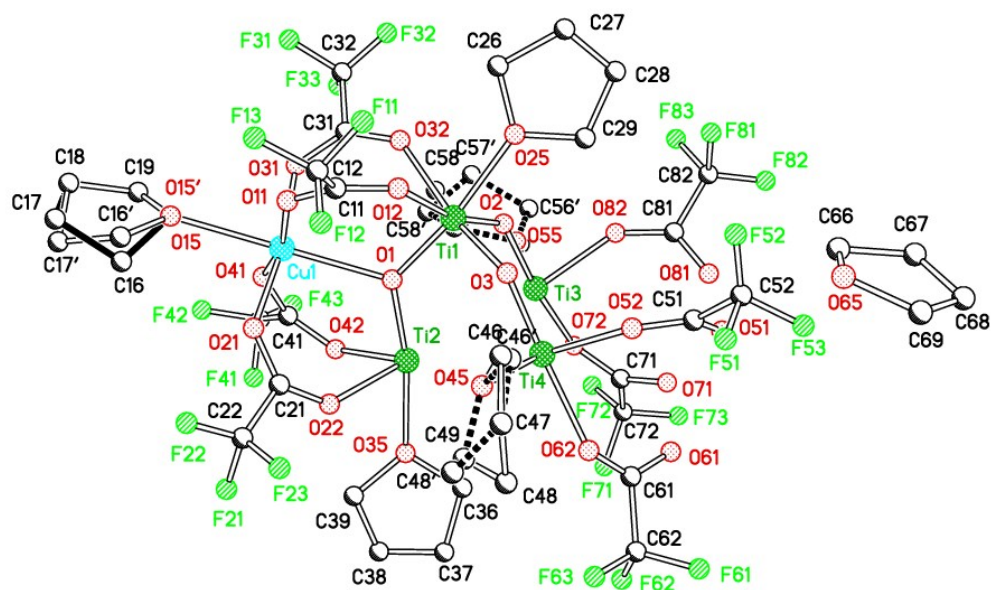

**SI. Figure 8:** Fig. Independent atoms – showing labelling and including disorder but not inversion symmetry

#### Crystal data

|                                                  |                                                         |
|--------------------------------------------------|---------------------------------------------------------|
| $C_{40}H_{52}Cu_2F_{24}O_{28}Ti_4 \cdot C_4H_8O$ | $D_x = 1.769 \text{ Mg m}^{-3}$                         |
| $M_r = 1827.60$                                  | Mo $K\alpha$ radiation, $\lambda = 0.71073 \text{ \AA}$ |
| Orthorhombic, $Pbca$                             | Cell parameters from 4831 reflections                   |
| $a = 18.8071 (11) \text{ \AA}$                   | $\theta = 2.2\text{--}20.4^\circ$                       |
| $b = 17.3656 (10) \text{ \AA}$                   | $\mu = 1.20 \text{ mm}^{-1}$                            |
| $c = 21.0146 (12) \text{ \AA}$                   | $T = 150 \text{ K}$                                     |
| $V = 6863.3 (7) \text{ \AA}^3$                   | Irreg, blue                                             |
| $Z = 4$                                          | $0.43 \times 0.32 \times 0.24 \text{ mm}$               |
| $F(000) = 3672$                                  |                                                         |

#### Data collection

|                                                                                |                                                                        |
|--------------------------------------------------------------------------------|------------------------------------------------------------------------|
| Bruker APEX 2 CCD diffractometer                                               | 4097 reflections with $I > 2\sigma(I)$                                 |
| Radiation source: fine-focus sealed tube                                       | $R_{\text{int}} = 0.101$                                               |
| $\omega$ rotation with narrow frames scans                                     | $\theta_{\text{max}} = 26.5^\circ$ , $\theta_{\text{min}} = 1.9^\circ$ |
| Absorption correction: multi-scan <i>SADABS</i> v2012/1, (Krause et al., 2015) | $h = -23 \rightarrow 23$                                               |
| $T_{\text{min}} = 0.592$ , $T_{\text{max}} = 0.745$                            | $k = -21 \rightarrow 21$                                               |
| 59386 measured reflections                                                     | $l = -26 \rightarrow 26$                                               |
| 7057 independent reflections                                                   |                                                                        |

## Refinement

|                                 |                                                                                      |
|---------------------------------|--------------------------------------------------------------------------------------|
| Refinement on $F^2$             | Primary atom site location: dual                                                     |
| Least-squares matrix: full      | Secondary atom site location: diff                                                   |
| $R[F^2 > 2\sigma(F^2)] = 0.067$ | Hydrogen site location: inferred from neighbouring sites                             |
| $wR(F^2) = 0.217$               | H-atom parameters constrained                                                        |
| $S = 1.01$                      | $w = 1/[\sigma^2(F_o^2) + (0.1115P)^2 + 12.7671P]$<br>where $P = (F_o^2 + 2F_c^2)/3$ |
| 7057 reflections                | $(\Delta/\sigma)_{\max} = 0.001$                                                     |
| 910 parameters                  | $\Delta\rho_{\max} = 0.65 \text{ e } \text{\AA}^{-3}$                                |
| 1810 restraints                 | $\Delta\rho_{\min} = -0.67 \text{ e } \text{\AA}^{-3}$                               |

## Computer Programs Used:

Data collection: *APEX2* v.2010.1-2 (Bruker Nonius, 2010); cell refinement: *SAINTE* v.7.68a (Bruker, 2010); data reduction: *SAINTE* v.7.68a (Bruker, 2010); program(s) used to solve structure: *SHELXT* (Sheldrick 2015a); program(s) used to refine structure: *SHELXL2014* (Sheldrick, 2015b); molecular graphics: Bruker *SHELXTL*, *Mercury* (Macrae et al., 2008); software used to prepare material for publication: *publCIF* (Westrip, 2010).

## Fractional atomic coordinates and isotropic or equivalent isotropic displacement parameters ( $\text{\AA}^2$ )

|      | <i>x</i>    | <i>y</i>    | <i>z</i>    | $U_{\text{iso}}^*/U_{\text{eq}}$ | Occ. (<1) |
|------|-------------|-------------|-------------|----------------------------------|-----------|
| Cu1  | 0.58852 (4) | 0.33059 (4) | 0.62937 (3) | 0.0446 (2)                       |           |
| O15  | 0.6372 (3)  | 0.2420 (2)  | 0.7010 (2)  | 0.0672 (12)                      | 0.5       |
| C16  | 0.5952 (13) | 0.1775 (11) | 0.7187 (12) | 0.143 (11)                       | 0.5       |
| H16A | 0.5796      | 0.1478      | 0.6810      | 0.172*                           | 0.5       |
| H16B | 0.5529      | 0.1934      | 0.7436      | 0.172*                           | 0.5       |
| C17  | 0.6482 (15) | 0.1303 (9)  | 0.7603 (12) | 0.140 (10)                       | 0.5       |
| H17A | 0.6229      | 0.0970      | 0.7911      | 0.168*                           | 0.5       |
| H17B | 0.6800      | 0.0982      | 0.7337      | 0.168*                           | 0.5       |
| C18  | 0.6860 (9)  | 0.1890 (6)  | 0.7913 (6)  | 0.190 (7)                        | 0.5       |
| H18A | 0.7378      | 0.1794      | 0.7882      | 0.228*                           | 0.5       |
| H18B | 0.6727      | 0.1909      | 0.8368      | 0.228*                           | 0.5       |
| C19  | 0.6682 (6)  | 0.2614 (5)  | 0.7604 (4)  | 0.122 (4)                        | 0.5       |
| H19A | 0.6341      | 0.2911      | 0.7867      | 0.146*                           | 0.5       |
| H19B | 0.7114      | 0.2930      | 0.7540      | 0.146*                           | 0.5       |
| O15' | 0.6372 (3)  | 0.2420 (2)  | 0.7010 (2)  | 0.0672 (12)                      | 0.5       |
| C16' | 0.6209 (13) | 0.1633 (7)  | 0.7028 (9)  | 0.101 (7)                        | 0.5       |

|      |              |              |              |             |     |
|------|--------------|--------------|--------------|-------------|-----|
| H16C | 0.6565       | 0.1325       | 0.6793       | 0.122*      | 0.5 |
| H16D | 0.5730       | 0.1530       | 0.6852       | 0.122*      | 0.5 |
| C17' | 0.6240 (17)  | 0.1469 (15)  | 0.7764 (11)  | 0.199 (12)  | 0.5 |
| H17C | 0.5817       | 0.1672       | 0.7989       | 0.239*      | 0.5 |
| H17D | 0.6295       | 0.0914       | 0.7857       | 0.239*      | 0.5 |
| C18' | 0.6860 (9)   | 0.1890 (6)   | 0.7913 (6)   | 0.190 (7)   | 0.5 |
| H18C | 0.7291       | 0.1653       | 0.7727       | 0.228*      | 0.5 |
| H18D | 0.6923       | 0.1952       | 0.8378       | 0.228*      | 0.5 |
| C19' | 0.6682 (6)   | 0.2614 (5)   | 0.7604 (4)   | 0.122 (4)   | 0.5 |
| H19C | 0.6341       | 0.2911       | 0.7867       | 0.146*      | 0.5 |
| H19D | 0.7114       | 0.2930       | 0.7540       | 0.146*      | 0.5 |
| Ti1  | 0.59907 (10) | 0.45013 (11) | 0.49293 (9)  | 0.0375 (4)  | 0.5 |
| Ti2  | 0.44911 (10) | 0.45252 (10) | 0.57682 (9)  | 0.0367 (4)  | 0.5 |
| Ti3  | 0.50852 (10) | 0.61396 (10) | 0.51090 (9)  | 0.0389 (5)  | 0.5 |
| Ti4  | 0.44471 (11) | 0.47352 (10) | 0.41941 (9)  | 0.0399 (5)  | 0.5 |
| O1   | 0.54034 (18) | 0.42158 (18) | 0.55985 (16) | 0.0369 (8)  |     |
| O2   | 0.58593 (18) | 0.55510 (19) | 0.50271 (16) | 0.0391 (8)  |     |
| H2   | 0.6291       | 0.5835       | 0.5036       | 0.047*      |     |
| O3   | 0.53502 (19) | 0.44177 (19) | 0.42908 (16) | 0.0396 (8)  |     |
| H3   | 0.5529       | 0.4149       | 0.3931       | 0.048*      |     |
| O11  | 0.6376 (10)  | 0.2696 (11)  | 0.5652 (6)   | 0.054 (4)   | 0.5 |
| O12  | 0.6366 (4)   | 0.3370 (4)   | 0.4756 (4)   | 0.0516 (19) | 0.5 |
| C11  | 0.6442 (7)   | 0.2768 (6)   | 0.5079 (6)   | 0.052 (3)   | 0.5 |
| C12  | 0.6622 (10)  | 0.2046 (8)   | 0.4713 (8)   | 0.092 (5)   | 0.5 |
| F11  | 0.7044 (9)   | 0.2228 (10)  | 0.4242 (7)   | 0.130 (6)   | 0.5 |
| F12  | 0.6110 (9)   | 0.1667 (10)  | 0.4448 (9)   | 0.153 (6)   | 0.5 |
| F13  | 0.7017 (10)  | 0.1586 (10)  | 0.5064 (10)  | 0.138 (7)   | 0.5 |
| O21  | 0.5086 (7)   | 0.2612 (10)  | 0.6232 (8)   | 0.055 (4)   | 0.5 |
| O22  | 0.4163 (4)   | 0.3388 (4)   | 0.5981 (4)   | 0.0486 (18) | 0.5 |
| C21  | 0.4458 (8)   | 0.2752 (8)   | 0.6099 (11)  | 0.063 (5)   | 0.5 |
| C22  | 0.3985 (9)   | 0.2057 (8)   | 0.6088 (10)  | 0.111 (6)   | 0.5 |
| F21  | 0.3438 (9)   | 0.2149 (9)   | 0.6467 (9)   | 0.169 (6)   | 0.5 |
| F22  | 0.4234 (9)   | 0.1416 (7)   | 0.6242 (10)  | 0.167 (6)   | 0.5 |
| F23  | 0.3676 (10)  | 0.1920 (11)  | 0.5538 (8)   | 0.163 (7)   | 0.5 |
| O31  | 0.6771 (10)  | 0.3907 (8)   | 0.6452 (7)   | 0.052 (4)   | 0.5 |
| O32  | 0.6900 (4)   | 0.4548 (5)   | 0.5524 (4)   | 0.0495 (18) | 0.5 |
| C31  | 0.7071 (8)   | 0.4344 (10)  | 0.6074 (8)   | 0.061 (4)   | 0.5 |
| C32  | 0.7752 (8)   | 0.4711 (10)  | 0.6306 (8)   | 0.106 (5)   | 0.5 |
| F31  | 0.8169 (10)  | 0.4185 (12)  | 0.6560 (10)  | 0.161 (8)   | 0.5 |
| F32  | 0.8122 (9)   | 0.5017 (13)  | 0.5871 (8)   | 0.164 (6)   | 0.5 |
| F33  | 0.7652 (9)   | 0.5219 (11)  | 0.6766 (9)   | 0.188 (6)   | 0.5 |

|      |             |             |             |             |     |
|------|-------------|-------------|-------------|-------------|-----|
| O41  | 0.5589 (16) | 0.3840 (13) | 0.7048 (14) | 0.058 (5)   | 0.5 |
| O42  | 0.4669 (4)  | 0.4584 (4)  | 0.6757 (4)  | 0.0498 (18) | 0.5 |
| C41  | 0.5106 (7)  | 0.4310 (7)  | 0.7145 (6)  | 0.049 (3)   | 0.5 |
| C42  | 0.5081 (10) | 0.4624 (10) | 0.7811 (7)  | 0.069 (4)   | 0.5 |
| F41  | 0.4408 (8)  | 0.4547 (10) | 0.7951 (10) | 0.123 (6)   | 0.5 |
| F42  | 0.5268 (10) | 0.4121 (10) | 0.8230 (8)  | 0.118 (6)   | 0.5 |
| F43  | 0.5189 (10) | 0.5352 (9)  | 0.7907 (10) | 0.134 (6)   | 0.5 |
| O51  | 0.4458 (19) | 0.6159 (12) | 0.2925 (14) | 0.065 (6)   | 0.5 |
| O52  | 0.4640 (5)  | 0.4917 (4)  | 0.3219 (4)  | 0.056 (2)   | 0.5 |
| C51  | 0.4641 (7)  | 0.5485 (7)  | 0.2846 (5)  | 0.048 (3)   | 0.5 |
| C52  | 0.4871 (8)  | 0.5289 (10) | 0.2176 (6)  | 0.056 (4)   | 0.5 |
| F51  | 0.4486 (8)  | 0.4664 (10) | 0.2052 (10) | 0.119 (5)   | 0.5 |
| F52  | 0.5496 (6)  | 0.5085 (9)  | 0.2050 (7)  | 0.093 (4)   | 0.5 |
| F53  | 0.4492 (7)  | 0.5675 (10) | 0.1758 (7)  | 0.088 (4)   | 0.5 |
| O61  | 0.3170 (9)  | 0.6237 (7)  | 0.3729 (7)  | 0.049 (4)   | 0.5 |
| O62  | 0.3373 (4)  | 0.4966 (4)  | 0.3922 (4)  | 0.0541 (19) | 0.5 |
| C61  | 0.3001 (7)  | 0.5558 (8)  | 0.3828 (9)  | 0.050 (4)   | 0.5 |
| C62  | 0.2210 (6)  | 0.5394 (7)  | 0.3768 (6)  | 0.065 (3)   | 0.5 |
| F61  | 0.1987 (7)  | 0.5628 (10) | 0.3197 (5)  | 0.094 (4)   | 0.5 |
| F62  | 0.1841 (6)  | 0.5741 (9)  | 0.4200 (6)  | 0.132 (4)   | 0.5 |
| F63  | 0.2076 (6)  | 0.4650 (6)  | 0.3827 (8)  | 0.101 (4)   | 0.5 |
| O71  | 0.3821 (9)  | 0.7412 (11) | 0.4378 (5)  | 0.044 (3)   | 0.5 |
| O72  | 0.4345 (4)  | 0.7023 (4)  | 0.5274 (3)  | 0.0472 (17) | 0.5 |
| C71  | 0.3896 (6)  | 0.7397 (7)  | 0.4954 (5)  | 0.048 (3)   | 0.5 |
| C72  | 0.3446 (8)  | 0.7972 (8)  | 0.5328 (6)  | 0.070 (4)   | 0.5 |
| F71  | 0.2832 (8)  | 0.7667 (11) | 0.5472 (8)  | 0.131 (5)   | 0.5 |
| F72  | 0.3760 (7)  | 0.8192 (8)  | 0.5842 (5)  | 0.089 (4)   | 0.5 |
| F73  | 0.3301 (8)  | 0.8590 (7)  | 0.4979 (7)  | 0.092 (4)   | 0.5 |
| O81  | 0.5034 (6)  | 0.7247 (10) | 0.3616 (7)  | 0.049 (3)   | 0.5 |
| O82  | 0.5600 (4)  | 0.6983 (4)  | 0.4547 (4)  | 0.0498 (18) | 0.5 |
| C81  | 0.5532 (7)  | 0.7281 (9)  | 0.3999 (8)  | 0.048 (4)   | 0.5 |
| C82  | 0.6136 (6)  | 0.7789 (7)  | 0.3790 (6)  | 0.061 (3)   | 0.5 |
| F81  | 0.6587 (6)  | 0.7330 (7)  | 0.3441 (6)  | 0.108 (3)   | 0.5 |
| F82  | 0.5985 (5)  | 0.8335 (6)  | 0.3405 (5)  | 0.073 (3)   | 0.5 |
| F83  | 0.6587 (6)  | 0.7981 (9)  | 0.4245 (6)  | 0.093 (4)   | 0.5 |
| O25  | 0.6795 (6)  | 0.4750 (8)  | 0.4220 (6)  | 0.051 (3)   | 0.5 |
| C26  | 0.7526 (8)  | 0.4609 (11) | 0.4233 (8)  | 0.087 (6)   | 0.5 |
| H26A | 0.7623      | 0.4051      | 0.4269      | 0.105*      | 0.5 |
| H26B | 0.7751      | 0.4876      | 0.4597      | 0.105*      | 0.5 |
| C27  | 0.7811 (9)  | 0.4927 (13) | 0.3600 (10) | 0.093 (7)   | 0.5 |
| H27A | 0.8292      | 0.5146      | 0.3655      | 0.111*      | 0.5 |

|      |             |             |             |            |      |
|------|-------------|-------------|-------------|------------|------|
| H27B | 0.7832      | 0.4515      | 0.3274      | 0.111*     | 0.5  |
| C28  | 0.7325 (11) | 0.5500 (11) | 0.3421 (8)  | 0.083 (6)  | 0.5  |
| H28A | 0.7232      | 0.5476      | 0.2957      | 0.099*     | 0.5  |
| H28B | 0.7516      | 0.6017      | 0.3524      | 0.099*     | 0.5  |
| C29  | 0.6670 (10) | 0.5357 (16) | 0.3777 (13) | 0.074 (7)  | 0.5  |
| H29A | 0.6524      | 0.5830      | 0.4005      | 0.088*     | 0.5  |
| H29B | 0.6283      | 0.5211      | 0.3481      | 0.088*     | 0.5  |
| O35  | 0.3437 (6)  | 0.4740 (8)  | 0.6090 (7)  | 0.056 (3)  | 0.5  |
| C36  | 0.2965 (9)  | 0.5200 (14) | 0.5726 (10) | 0.068 (5)  | 0.5  |
| H36A | 0.2937      | 0.5004      | 0.5284      | 0.082*     | 0.5  |
| H36B | 0.3134      | 0.5739      | 0.5714      | 0.082*     | 0.5  |
| C37  | 0.2239 (8)  | 0.5158 (10) | 0.6041 (10) | 0.074 (4)  | 0.5  |
| H37A | 0.2070      | 0.5680      | 0.6153      | 0.089*     | 0.5  |
| H37B | 0.1889      | 0.4918      | 0.5750      | 0.089*     | 0.5  |
| C38  | 0.2324 (8)  | 0.4708 (11) | 0.6591 (8)  | 0.071 (4)  | 0.5  |
| H38A | 0.1947      | 0.4311      | 0.6613      | 0.086*     | 0.5  |
| H38B | 0.2289      | 0.5036      | 0.6975      | 0.086*     | 0.5  |
| C39  | 0.3021 (8)  | 0.4344 (10) | 0.6561 (8)  | 0.072 (4)  | 0.5  |
| H39A | 0.3258      | 0.4375      | 0.6981      | 0.086*     | 0.5  |
| H39B | 0.2970      | 0.3795      | 0.6445      | 0.086*     | 0.5  |
| O45  | 0.4264 (6)  | 0.3420 (7)  | 0.4065 (7)  | 0.086 (3)  | 0.25 |
| C46  | 0.4585 (14) | 0.305 (3)   | 0.3548 (17) | 0.051 (6)  | 0.25 |
| H46A | 0.4993      | 0.2730      | 0.3688      | 0.061*     | 0.25 |
| H46B | 0.4750      | 0.3425      | 0.3226      | 0.061*     | 0.25 |
| C47  | 0.3968 (10) | 0.2537 (13) | 0.3283 (9)  | 0.107 (8)  | 0.25 |
| H47A | 0.3957      | 0.2549      | 0.2812      | 0.128*     | 0.25 |
| H47B | 0.4018      | 0.1996      | 0.3426      | 0.128*     | 0.25 |
| C48  | 0.3342 (11) | 0.289 (3)   | 0.3547 (12) | 0.103 (10) | 0.25 |
| H48A | 0.2947      | 0.2510      | 0.3571      | 0.124*     | 0.25 |
| H48B | 0.3188      | 0.3332      | 0.3289      | 0.124*     | 0.25 |
| C49  | 0.3561 (6)  | 0.3127 (7)  | 0.4178 (6)  | 0.068 (3)  | 0.25 |
| H49A | 0.3243      | 0.3532      | 0.4348      | 0.082*     | 0.25 |
| H49B | 0.3569      | 0.2687      | 0.4478      | 0.082*     | 0.25 |
| O45' | 0.4264 (6)  | 0.3420 (7)  | 0.4065 (7)  | 0.086 (3)  | 0.25 |
| C46' | 0.454 (2)   | 0.313 (3)   | 0.350 (2)   | 0.077 (16) | 0.25 |
| H46C | 0.5005      | 0.2873      | 0.3575      | 0.093*     | 0.25 |
| H46D | 0.4604      | 0.3542      | 0.3181      | 0.093*     | 0.25 |
| C47' | 0.3968 (10) | 0.2537 (13) | 0.3283 (9)  | 0.107 (8)  | 0.25 |
| H47C | 0.3690      | 0.2744      | 0.2921      | 0.128*     | 0.25 |
| H47D | 0.4194      | 0.2048      | 0.3149      | 0.128*     | 0.25 |
| C48' | 0.352 (2)   | 0.2415 (17) | 0.3820 (16) | 0.107 (12) | 0.25 |

|      |             |             |              |           |      |
|------|-------------|-------------|--------------|-----------|------|
| H48C | 0.3695      | 0.1977      | 0.4078       | 0.129*    | 0.25 |
| H48D | 0.3027      | 0.2309      | 0.3685       | 0.129*    | 0.25 |
| C49' | 0.3561 (6)  | 0.3127 (7)  | 0.4178 (6)   | 0.068 (3) | 0.25 |
| H49C | 0.3197      | 0.3497      | 0.4028       | 0.082*    | 0.25 |
| H49D | 0.3485      | 0.3029      | 0.4637       | 0.082*    | 0.25 |
| O55  | 0.5625 (6)  | 0.6941 (6)  | 0.5819 (5)   | 0.072 (3) | 0.25 |
| C56  | 0.557 (2)   | 0.7610 (12) | 0.6216 (12)  | 0.090 (7) | 0.25 |
| H56A | 0.5070      | 0.7776      | 0.6260       | 0.108*    | 0.25 |
| H56B | 0.5853      | 0.8041      | 0.6040       | 0.108*    | 0.25 |
| C57  | 0.5876 (19) | 0.7343 (17) | 0.6864 (11)  | 0.078 (7) | 0.25 |
| H57A | 0.6146      | 0.7761      | 0.7074       | 0.094*    | 0.25 |
| H57B | 0.5492      | 0.7168      | 0.7153       | 0.094*    | 0.25 |
| C58  | 0.6335 (16) | 0.6716 (15) | 0.6692 (13)  | 0.078 (7) | 0.25 |
| H58A | 0.6440      | 0.6377      | 0.7059       | 0.093*    | 0.25 |
| H58B | 0.6784      | 0.6897      | 0.6499       | 0.093*    | 0.25 |
| C59  | 0.5872 (8)  | 0.6340 (6)  | 0.6226 (6)   | 0.055 (3) | 0.25 |
| H59A | 0.6140      | 0.5950      | 0.5980       | 0.065*    | 0.25 |
| H59B | 0.5468      | 0.6084      | 0.6441       | 0.065*    | 0.25 |
| O55' | 0.5625 (6)  | 0.6941 (6)  | 0.5819 (5)   | 0.072 (3) | 0.25 |
| C56' | 0.5985 (19) | 0.7624 (11) | 0.6052 (14)  | 0.086 (7) | 0.25 |
| H56C | 0.5637      | 0.8004      | 0.6214       | 0.103*    | 0.25 |
| H56D | 0.6268      | 0.7867      | 0.5710       | 0.103*    | 0.25 |
| C57' | 0.6476 (18) | 0.7337 (17) | 0.6598 (16)  | 0.085 (8) | 0.25 |
| H57C | 0.6950      | 0.7186      | 0.6435       | 0.102*    | 0.25 |
| H57D | 0.6534      | 0.7733      | 0.6932       | 0.102*    | 0.25 |
| C58' | 0.6089 (18) | 0.6687 (14) | 0.6827 (9)   | 0.077 (7) | 0.25 |
| H58C | 0.5674      | 0.6844      | 0.7087       | 0.092*    | 0.25 |
| H58D | 0.6395      | 0.6336      | 0.7078       | 0.092*    | 0.25 |
| C59' | 0.5872 (8)  | 0.6340 (6)  | 0.6226 (6)   | 0.055 (3) | 0.25 |
| H59C | 0.6280      | 0.6071      | 0.6028       | 0.065*    | 0.25 |
| H59D | 0.5488      | 0.5960      | 0.6300       | 0.065*    | 0.25 |
| O65  | 0.5058 (7)  | 0.3627 (7)  | 0.0252 (5)   | 0.100 (4) | 0.5  |
| C66  | 0.5287 (11) | 0.4280 (10) | 0.0599 (9)   | 0.099 (5) | 0.5  |
| H66A | 0.5801      | 0.4241      | 0.0694       | 0.118*    | 0.5  |
| H66B | 0.5024      | 0.4316      | 0.1007       | 0.118*    | 0.5  |
| C67  | 0.514 (3)   | 0.496 (2)   | 0.020 (2)    | 0.20 (2)  | 0.5  |
| H67A | 0.4925      | 0.5366      | 0.0469       | 0.244*    | 0.5  |
| H67B | 0.5598      | 0.5161      | 0.0034       | 0.244*    | 0.5  |
| C68  | 0.4707 (16) | 0.4790 (16) | -0.0283 (13) | 0.113 (7) | 0.5  |
| H68A | 0.4908      | 0.4968      | -0.0693      | 0.136*    | 0.5  |
| H68B | 0.4234      | 0.5028      | -0.0222      | 0.136*    | 0.5  |

|      |             |             |             |           |     |
|------|-------------|-------------|-------------|-----------|-----|
| C69  | 0.4661 (12) | 0.3951 (12) | -0.0263 (9) | 0.111 (6) | 0.5 |
| H69A | 0.4156      | 0.3798      | -0.0220     | 0.133*    | 0.5 |
| H69B | 0.4842      | 0.3739      | -0.0669     | 0.133*    | 0.5 |

*Atomic displacement parameters (Å<sup>2</sup>)*

|      | $U^{11}$    | $U^{22}$    | $U^{33}$    | $U^{12}$     | $U^{13}$     | $U^{23}$     |
|------|-------------|-------------|-------------|--------------|--------------|--------------|
| Cu1  | 0.0525 (4)  | 0.0366 (4)  | 0.0447 (4)  | 0.0027 (3)   | -0.0052 (3)  | 0.0041 (3)   |
| O15  | 0.103 (3)   | 0.046 (2)   | 0.053 (2)   | 0.006 (2)    | -0.018 (2)   | 0.0118 (19)  |
| C16  | 0.184 (15)  | 0.100 (11)  | 0.145 (17)  | -0.041 (11)  | -0.078 (13)  | 0.069 (12)   |
| C17  | 0.21 (2)    | 0.078 (8)   | 0.132 (16)  | -0.006 (8)   | -0.090 (16)  | 0.045 (8)    |
| C18  | 0.302 (15)  | 0.102 (6)   | 0.166 (9)   | -0.025 (7)   | -0.134 (10)  | 0.048 (6)    |
| C19  | 0.188 (10)  | 0.085 (5)   | 0.093 (5)   | -0.002 (5)   | -0.060 (6)   | 0.014 (4)    |
| O15' | 0.103 (3)   | 0.046 (2)   | 0.053 (2)   | 0.006 (2)    | -0.018 (2)   | 0.0118 (19)  |
| C16' | 0.149 (16)  | 0.040 (5)   | 0.115 (11)  | 0.011 (6)    | -0.065 (11)  | 0.016 (6)    |
| C17' | 0.32 (2)    | 0.148 (15)  | 0.127 (13)  | -0.083 (16)  | -0.094 (13)  | 0.056 (11)   |
| C18' | 0.302 (15)  | 0.102 (6)   | 0.166 (9)   | -0.025 (7)   | -0.134 (10)  | 0.048 (6)    |
| C19' | 0.188 (10)  | 0.085 (5)   | 0.093 (5)   | -0.002 (5)   | -0.060 (6)   | 0.014 (4)    |
| Ti1  | 0.0407 (10) | 0.0338 (9)  | 0.0381 (10) | 0.0036 (8)   | -0.0018 (8)  | 0.0036 (8)   |
| Ti2  | 0.0387 (10) | 0.0322 (9)  | 0.0392 (10) | 0.0006 (8)   | -0.0019 (8)  | 0.0044 (8)   |
| Ti3  | 0.0496 (11) | 0.0270 (9)  | 0.0401 (10) | -0.0007 (8)  | -0.0103 (8)  | 0.0011 (8)   |
| Ti4  | 0.0525 (11) | 0.0275 (9)  | 0.0398 (10) | -0.0017 (8)  | -0.0157 (9)  | -0.0005 (8)  |
| O1   | 0.0431 (18) | 0.0302 (16) | 0.0373 (18) | 0.0013 (14)  | -0.0062 (14) | 0.0008 (14)  |
| O2   | 0.0401 (19) | 0.0332 (17) | 0.044 (2)   | -0.0044 (14) | -0.0068 (15) | 0.0012 (15)  |
| O3   | 0.049 (2)   | 0.0345 (18) | 0.0352 (18) | 0.0045 (15)  | -0.0036 (15) | -0.0036 (15) |
| O11  | 0.066 (10)  | 0.038 (6)   | 0.058 (5)   | 0.006 (6)    | 0.000 (4)    | 0.004 (4)    |
| O12  | 0.062 (5)   | 0.041 (3)   | 0.052 (4)   | 0.007 (3)    | 0.003 (3)    | 0.006 (3)    |
| C11  | 0.060 (8)   | 0.038 (5)   | 0.060 (5)   | 0.004 (5)    | -0.004 (5)   | 0.003 (4)    |
| C12  | 0.131 (11)  | 0.050 (7)   | 0.094 (8)   | 0.014 (6)    | 0.024 (7)    | -0.010 (6)   |
| F11  | 0.168 (12)  | 0.106 (9)   | 0.117 (9)   | 0.018 (8)    | 0.043 (8)    | -0.007 (7)   |
| F12  | 0.167 (11)  | 0.122 (10)  | 0.170 (14)  | -0.013 (7)   | 0.007 (9)    | -0.047 (10)  |
| F13  | 0.182 (14)  | 0.089 (9)   | 0.143 (10)  | 0.049 (9)    | 0.003 (9)    | -0.009 (7)   |
| O21  | 0.065 (5)   | 0.035 (6)   | 0.063 (8)   | -0.001 (4)   | -0.006 (5)   | 0.015 (5)    |
| O22  | 0.046 (4)   | 0.038 (3)   | 0.062 (5)   | -0.007 (3)   | -0.001 (3)   | 0.008 (3)    |
| C21  | 0.068 (6)   | 0.035 (5)   | 0.084 (12)  | -0.004 (4)   | -0.014 (6)   | 0.012 (5)    |
| C22  | 0.105 (9)   | 0.056 (6)   | 0.171 (14)  | -0.035 (6)   | -0.014 (8)   | 0.006 (7)    |
| F21  | 0.155 (10)  | 0.116 (10)  | 0.234 (15)  | -0.056 (9)   | 0.030 (10)   | -0.001 (10)  |
| F22  | 0.149 (11)  | 0.059 (6)   | 0.294 (18)  | -0.034 (6)   | -0.033 (11)  | 0.023 (8)    |
| F23  | 0.171 (14)  | 0.118 (10)  | 0.198 (13)  | -0.080 (10)  | -0.031 (9)   | -0.009 (8)   |
| O31  | 0.058 (6)   | 0.053 (6)   | 0.046 (6)   | 0.001 (5)    | -0.013 (4)   | 0.002 (5)    |
| O32  | 0.043 (4)   | 0.055 (4)   | 0.051 (4)   | -0.003 (3)   | -0.004 (3)   | 0.011 (3)    |
| C31  | 0.062 (7)   | 0.062 (9)   | 0.058 (6)   | 0.002 (6)    | -0.010 (5)   | 0.011 (5)    |

|     |            |            |            |             |             |            |
|-----|------------|------------|------------|-------------|-------------|------------|
| C32 | 0.083 (8)  | 0.121 (11) | 0.114 (10) | -0.028 (7)  | -0.036 (7)  | 0.008 (7)  |
| F31 | 0.101 (10) | 0.171 (12) | 0.211 (17) | -0.011 (8)  | -0.059 (10) | 0.029 (11) |
| F32 | 0.122 (11) | 0.210 (15) | 0.159 (12) | -0.067 (11) | -0.011 (8)  | 0.025 (10) |
| F33 | 0.199 (13) | 0.181 (12) | 0.184 (11) | -0.043 (10) | -0.037 (10) | -0.057 (9) |
| O41 | 0.062 (8)  | 0.061 (8)  | 0.051 (8)  | 0.014 (6)   | -0.010 (5)  | 0.004 (5)  |
| O42 | 0.053 (4)  | 0.052 (4)  | 0.044 (4)  | 0.006 (3)   | -0.001 (3)  | 0.001 (3)  |
| C41 | 0.050 (6)  | 0.049 (6)  | 0.048 (5)  | -0.004 (5)  | -0.004 (4)  | 0.011 (4)  |
| C42 | 0.083 (9)  | 0.074 (7)  | 0.050 (6)  | -0.004 (6)  | 0.006 (5)   | 0.001 (5)  |
| F41 | 0.103 (7)  | 0.155 (13) | 0.110 (9)  | -0.025 (7)  | 0.020 (6)   | -0.004 (9) |
| F42 | 0.182 (14) | 0.114 (9)  | 0.057 (6)  | 0.025 (9)   | 0.006 (8)   | 0.011 (6)  |
| F43 | 0.163 (15) | 0.097 (7)  | 0.141 (11) | -0.018 (8)  | -0.007 (11) | -0.019 (6) |
| O51 | 0.105 (15) | 0.049 (6)  | 0.040 (8)  | 0.020 (7)   | -0.003 (7)  | 0.005 (5)  |
| O52 | 0.077 (5)  | 0.050 (4)  | 0.040 (4)  | 0.003 (4)   | -0.012 (3)  | 0.000 (3)  |
| C51 | 0.058 (8)  | 0.045 (5)  | 0.042 (5)  | -0.002 (5)  | -0.010 (4)  | 0.002 (4)  |
| C52 | 0.053 (6)  | 0.069 (8)  | 0.046 (6)  | 0.000 (5)   | -0.004 (4)  | -0.007 (5) |
| F51 | 0.094 (8)  | 0.131 (8)  | 0.131 (10) | -0.030 (6)  | 0.005 (7)   | -0.035 (6) |
| F52 | 0.066 (5)  | 0.135 (11) | 0.079 (7)  | 0.010 (6)   | 0.000 (5)   | -0.015 (8) |
| F53 | 0.081 (7)  | 0.135 (9)  | 0.049 (5)  | 0.020 (6)   | -0.017 (5)  | -0.014 (5) |
| O61 | 0.044 (5)  | 0.045 (5)  | 0.058 (9)  | 0.003 (4)   | -0.006 (6)  | -0.002 (5) |
| O62 | 0.054 (4)  | 0.046 (4)  | 0.063 (5)  | -0.007 (3)  | -0.024 (3)  | 0.009 (3)  |
| C61 | 0.047 (5)  | 0.047 (5)  | 0.056 (9)  | -0.005 (4)  | -0.017 (5)  | 0.006 (5)  |
| C62 | 0.046 (6)  | 0.076 (6)  | 0.073 (7)  | -0.008 (4)  | -0.020 (4)  | 0.018 (5)  |
| F61 | 0.058 (6)  | 0.138 (10) | 0.086 (6)  | -0.006 (6)  | -0.035 (5)  | 0.016 (6)  |
| F62 | 0.099 (7)  | 0.154 (9)  | 0.141 (8)  | 0.003 (7)   | 0.040 (6)   | -0.010 (7) |
| F63 | 0.061 (6)  | 0.086 (5)  | 0.156 (11) | -0.028 (4)  | -0.012 (6)  | 0.013 (6)  |
| O71 | 0.049 (8)  | 0.035 (6)  | 0.050 (4)  | -0.003 (5)  | -0.005 (4)  | 0.003 (4)  |
| O72 | 0.062 (4)  | 0.038 (4)  | 0.041 (4)  | 0.008 (3)   | -0.004 (3)  | 0.002 (3)  |
| C71 | 0.054 (6)  | 0.040 (5)  | 0.050 (5)  | 0.001 (5)   | 0.000 (4)   | 0.004 (4)  |
| C72 | 0.087 (7)  | 0.066 (7)  | 0.056 (6)  | 0.033 (5)   | 0.006 (5)   | 0.000 (5)  |
| F71 | 0.114 (7)  | 0.155 (11) | 0.123 (11) | -0.004 (7)  | 0.026 (7)   | -0.017 (9) |
| F72 | 0.113 (8)  | 0.094 (7)  | 0.059 (5)  | 0.039 (6)   | 0.003 (5)   | -0.013 (5) |
| F73 | 0.136 (10) | 0.058 (6)  | 0.083 (6)  | 0.043 (6)   | -0.003 (6)  | -0.007 (4) |
| O81 | 0.051 (6)  | 0.043 (7)  | 0.054 (7)  | 0.004 (4)   | 0.002 (5)   | 0.005 (5)  |
| O82 | 0.053 (4)  | 0.037 (4)  | 0.060 (4)  | -0.008 (3)  | -0.008 (3)  | 0.010 (3)  |
| C81 | 0.051 (6)  | 0.035 (7)  | 0.059 (6)  | -0.002 (5)  | -0.003 (4)  | 0.015 (5)  |
| C82 | 0.050 (5)  | 0.061 (6)  | 0.072 (6)  | -0.012 (4)  | 0.001 (4)   | 0.030 (5)  |
| F81 | 0.093 (6)  | 0.105 (7)  | 0.125 (7)  | 0.010 (6)   | 0.040 (5)   | 0.017 (6)  |
| F82 | 0.075 (6)  | 0.060 (5)  | 0.085 (6)  | -0.014 (4)  | 0.004 (4)   | 0.036 (4)  |
| F83 | 0.077 (6)  | 0.106 (8)  | 0.097 (6)  | -0.033 (5)  | -0.010 (5)  | 0.028 (6)  |
| O25 | 0.053 (5)  | 0.051 (5)  | 0.050 (5)  | 0.000 (4)   | 0.010 (4)   | 0.005 (4)  |
| C26 | 0.055 (6)  | 0.118 (13) | 0.089 (9)  | 0.017 (7)   | 0.029 (6)   | 0.049 (9)  |



|      |            |            |            |             |             |             |
|------|------------|------------|------------|-------------|-------------|-------------|
| C27  | 0.074 (8)  | 0.108 (14) | 0.096 (12) | 0.020 (8)   | 0.040 (8)   | 0.042 (10)  |
| C28  | 0.075 (10) | 0.094 (11) | 0.080 (9)  | 0.012 (8)   | 0.028 (8)   | 0.027 (9)   |
| C29  | 0.070 (9)  | 0.076 (11) | 0.075 (10) | 0.019 (8)   | 0.025 (7)   | 0.029 (9)   |
| O35  | 0.042 (4)  | 0.059 (6)  | 0.067 (7)  | 0.001 (4)   | 0.004 (4)   | 0.002 (5)   |
| C36  | 0.052 (7)  | 0.076 (10) | 0.076 (8)  | 0.009 (7)   | -0.008 (6)  | -0.001 (7)  |
| C37  | 0.053 (7)  | 0.067 (9)  | 0.103 (11) | 0.006 (6)   | -0.001 (6)  | -0.006 (8)  |
| C38  | 0.043 (7)  | 0.069 (10) | 0.102 (9)  | 0.003 (6)   | 0.007 (6)   | -0.005 (7)  |
| C39  | 0.048 (7)  | 0.076 (8)  | 0.092 (9)  | 0.012 (6)   | 0.019 (6)   | 0.014 (7)   |
| O45  | 0.094 (6)  | 0.063 (6)  | 0.101 (7)  | -0.031 (5)  | 0.009 (5)   | -0.038 (5)  |
| C46  | 0.082 (9)  | 0.025 (9)  | 0.045 (9)  | -0.009 (7)  | -0.010 (7)  | 0.006 (7)   |
| C47  | 0.103 (9)  | 0.111 (14) | 0.107 (11) | -0.051 (9)  | 0.016 (7)   | -0.058 (11) |
| C48  | 0.089 (10) | 0.14 (2)   | 0.081 (12) | -0.034 (9)  | -0.003 (7)  | -0.045 (13) |
| C49  | 0.077 (6)  | 0.055 (7)  | 0.072 (7)  | -0.025 (5)  | -0.006 (5)  | -0.015 (5)  |
| O45' | 0.094 (6)  | 0.063 (6)  | 0.101 (7)  | -0.031 (5)  | 0.009 (5)   | -0.038 (5)  |
| C46' | 0.085 (13) | 0.07 (3)   | 0.079 (16) | -0.024 (17) | 0.004 (13)  | -0.027 (19) |
| C47' | 0.103 (9)  | 0.111 (14) | 0.107 (11) | -0.051 (9)  | 0.016 (7)   | -0.058 (11) |
| C48' | 0.117 (18) | 0.083 (12) | 0.122 (17) | -0.052 (13) | 0.028 (15)  | -0.047 (13) |
| C49' | 0.077 (6)  | 0.055 (7)  | 0.072 (7)  | -0.025 (5)  | -0.006 (5)  | -0.015 (5)  |
| O55  | 0.094 (6)  | 0.059 (4)  | 0.063 (4)  | 0.003 (4)   | -0.031 (4)  | 0.012 (3)   |
| C56  | 0.109 (14) | 0.074 (8)  | 0.087 (9)  | 0.006 (8)   | -0.020 (9)  | -0.003 (6)  |
| C57  | 0.087 (13) | 0.075 (10) | 0.073 (9)  | -0.012 (9)  | -0.014 (8)  | 0.000 (7)   |
| C58  | 0.086 (11) | 0.081 (10) | 0.066 (10) | -0.006 (8)  | -0.028 (8)  | -0.001 (7)  |
| C59  | 0.071 (7)  | 0.045 (4)  | 0.047 (5)  | -0.002 (4)  | -0.027 (5)  | 0.012 (4)   |
| O55' | 0.094 (6)  | 0.059 (4)  | 0.063 (4)  | 0.003 (4)   | -0.031 (4)  | 0.012 (3)   |
| C56' | 0.103 (13) | 0.070 (7)  | 0.085 (11) | -0.009 (7)  | -0.024 (10) | 0.010 (7)   |
| C57' | 0.095 (12) | 0.081 (10) | 0.080 (11) | -0.012 (9)  | -0.028 (9)  | 0.008 (8)   |
| C58' | 0.091 (13) | 0.077 (9)  | 0.062 (7)  | -0.010 (9)  | -0.025 (7)  | 0.003 (6)   |
| C59' | 0.071 (7)  | 0.045 (4)  | 0.047 (5)  | -0.002 (4)  | -0.027 (5)  | 0.012 (4)   |
| O65  | 0.130 (10) | 0.091 (7)  | 0.080 (7)  | -0.011 (6)  | -0.020 (6)  | -0.021 (5)  |
| C66  | 0.113 (12) | 0.091 (8)  | 0.092 (9)  | -0.005 (8)  | -0.026 (9)  | -0.029 (7)  |
| C67  | 0.32 (4)   | 0.103 (11) | 0.19 (2)   | -0.043 (11) | -0.16 (3)   | 0.005 (10)  |
| C68  | 0.135 (17) | 0.111 (11) | 0.094 (12) | -0.015 (10) | -0.030 (12) | -0.013 (9)  |
| C69  | 0.134 (14) | 0.113 (10) | 0.086 (9)  | -0.017 (10) | -0.033 (10) | -0.011 (8)  |

*Geometric parameters (Å, °) for (ct)*

|         |            |         |            |
|---------|------------|---------|------------|
| Cu1—O41 | 1.92 (2)   | C42—F42 | 1.288 (14) |
| Cu1—O21 | 1.930 (16) | C42—F43 | 1.297 (14) |
| Cu1—O11 | 1.947 (18) | C42—F41 | 1.305 (15) |
| Cu1—O31 | 1.994 (16) | O51—C51 | 1.231 (13) |
| Cu1—O1  | 2.335 (3)  | O52—C51 | 1.259 (11) |
| Cu1—O15 | 2.339 (4)  | C51—C52 | 1.512 (12) |

|           |            |           |            |
|-----------|------------|-----------|------------|
| Cu1—O15'  | 2.339 (4)  | C52—F52   | 1.256 (13) |
| O15—C19   | 1.419 (8)  | C52—F53   | 1.316 (13) |
| O15—C16   | 1.420 (14) | C52—F51   | 1.331 (14) |
| C16—C17   | 1.559 (16) | O61—C61   | 1.239 (12) |
| C17—C18   | 1.403 (15) | O62—C61   | 1.259 (13) |
| C18—C19   | 1.454 (10) | C61—C62   | 1.519 (12) |
| O15'—C16' | 1.400 (12) | C62—F62   | 1.292 (13) |
| O15'—C19' | 1.419 (8)  | C62—F63   | 1.323 (13) |
| C16'—C17' | 1.575 (17) | C62—F61   | 1.336 (12) |
| C17'—C18' | 1.411 (17) | O71—C71   | 1.218 (11) |
| C18'—C19' | 1.454 (10) | O72—C71   | 1.260 (11) |
| Ti1—O3    | 1.809 (4)  | C71—C72   | 1.527 (12) |
| Ti1—O2    | 1.851 (4)  | C72—F72   | 1.290 (13) |
| Ti1—O1    | 1.856 (4)  | C72—F71   | 1.306 (13) |
| Ti1—O32   | 2.119 (7)  | C72—F73   | 1.327 (12) |
| Ti1—O12   | 2.120 (7)  | O81—C81   | 1.236 (12) |
| Ti1—O25   | 2.167 (10) | O82—C81   | 1.270 (13) |
| Ti1—Ti4   | 3.314 (3)  | C81—C82   | 1.505 (12) |
| Ti1—Ti2   | 3.326 (3)  | C82—F82   | 1.278 (11) |
| Ti1—Ti3   | 3.337 (3)  | C82—F83   | 1.321 (12) |
| Ti2—O1    | 1.833 (4)  | C82—F81   | 1.375 (13) |
| Ti2—O42   | 2.107 (8)  | O25—C26   | 1.397 (13) |
| Ti2—O22   | 2.117 (7)  | O25—C29   | 1.427 (14) |
| Ti2—O35   | 2.128 (11) | C26—C27   | 1.537 (14) |
| Ti2—Ti3   | 3.321 (3)  | C27—C28   | 1.403 (15) |
| Ti2—Ti4   | 3.329 (3)  | C28—C29   | 1.463 (15) |
| Ti3—O2    | 1.787 (4)  | O35—C36   | 1.419 (14) |
| Ti3—O72   | 2.100 (7)  | O35—C39   | 1.436 (13) |
| Ti3—O82   | 2.115 (7)  | C36—C37   | 1.518 (15) |
| Ti3—O55   | 2.278 (10) | C37—C38   | 1.405 (15) |
| Ti3—Ti4   | 3.329 (3)  | C38—C39   | 1.457 (14) |
| Ti4—O3    | 1.797 (4)  | O45—C46   | 1.400 (15) |
| Ti4—O52   | 2.105 (8)  | O45—C49   | 1.436 (11) |
| Ti4—O62   | 2.138 (8)  | C46—C47   | 1.565 (16) |
| Ti4—O45   | 2.326 (11) | C47—C48   | 1.437 (17) |
| O11—C11   | 1.218 (11) | C48—C49   | 1.450 (16) |
| O12—C11   | 1.254 (11) | O45'—C46' | 1.392 (15) |
| C11—C12   | 1.509 (12) | O45'—C49' | 1.436 (11) |
| C12—F12   | 1.292 (14) | C46'—C47' | 1.559 (17) |
| C12—F11   | 1.308 (14) | C47'—C48' | 1.423 (17) |
| C12—F13   | 1.317 (13) | C48'—C49' | 1.448 (16) |

|                |             |             |             |
|----------------|-------------|-------------|-------------|
| O21—C21        | 1.239 (12)  | O55—C59     | 1.427 (11)  |
| O22—C21        | 1.260 (13)  | O55—C56     | 1.435 (15)  |
| C21—C22        | 1.500 (13)  | C56—C57     | 1.548 (17)  |
| C22—F22        | 1.251 (13)  | C57—C58     | 1.436 (18)  |
| C22—F21        | 1.311 (15)  | C58—C59     | 1.463 (16)  |
| C22—F23        | 1.316 (14)  | O55'—C59'   | 1.427 (11)  |
| O31—C31        | 1.235 (13)  | O55'—C56'   | 1.451 (15)  |
| O32—C31        | 1.252 (13)  | C56'—C57'   | 1.554 (18)  |
| C31—C32        | 1.511 (13)  | C57'—C58'   | 1.427 (18)  |
| C32—F32        | 1.266 (14)  | C58'—C59'   | 1.458 (16)  |
| C32—F31        | 1.317 (14)  | O65—C69     | 1.43 (2)    |
| C32—F33        | 1.323 (14)  | O65—C66     | 1.415 (18)  |
| O41—C41        | 1.237 (14)  | C66—C67     | 1.47 (4)    |
| O42—C41        | 1.253 (11)  | C67—C68     | 1.34 (3)    |
| C41—C42        | 1.503 (12)  | C68—C69     | 1.46 (3)    |
|                |             |             |             |
| O41—Cu1—O21    | 97.5 (12)   | Ti1—O1—Cu1  | 115.09 (17) |
| O41—Cu1—O11    | 166.6 (9)   | Ti3—O2—Ti1  | 133.1 (2)   |
| O21—Cu1—O11    | 89.0 (7)    | Ti4—O3—Ti1  | 133.5 (2)   |
| O41—Cu1—O31    | 81.5 (12)   | C11—O11—Cu1 | 132.7 (15)  |
| O21—Cu1—O31    | 171.2 (7)   | C11—O12—Ti1 | 135.9 (7)   |
| O11—Cu1—O31    | 90.3 (7)    | O11—C11—O12 | 127.5 (13)  |
| O41—Cu1—O1     | 94.4 (7)    | O11—C11—C12 | 116.2 (13)  |
| O21—Cu1—O1     | 94.5 (5)    | O12—C11—C12 | 116.3 (11)  |
| O11—Cu1—O1     | 96.8 (5)    | F12—C12—F11 | 104.5 (15)  |
| O31—Cu1—O1     | 94.3 (5)    | F12—C12—F13 | 110.6 (14)  |
| O41—Cu1—O15    | 84.3 (7)    | F11—C12—F13 | 103.2 (15)  |
| O21—Cu1—O15    | 86.4 (5)    | F12—C12—C11 | 118.4 (14)  |
| O11—Cu1—O15    | 84.4 (5)    | F11—C12—C11 | 108.7 (13)  |
| O31—Cu1—O15    | 84.8 (5)    | F13—C12—C11 | 110.2 (13)  |
| O1—Cu1—O15     | 178.50 (14) | C21—O21—Cu1 | 129.4 (13)  |
| C19—O15—C16    | 100.7 (10)  | C21—O22—Ti2 | 136.9 (8)   |
| C19—O15—Cu1    | 124.8 (4)   | O21—C21—O22 | 129.6 (13)  |
| C16—O15—Cu1    | 118.0 (7)   | O21—C21—C22 | 114.3 (13)  |
| O15—C16—C17    | 101.9 (13)  | O22—C21—C22 | 116.1 (11)  |
| C18—C17—C16    | 101.6 (12)  | F22—C22—F21 | 104.2 (15)  |
| C17—C18—C19    | 107.8 (9)   | F22—C22—F23 | 103.3 (15)  |
| O15—C19—C18    | 106.3 (7)   | F21—C22—F23 | 102.1 (15)  |
| C16'—O15'—C19' | 107.4 (8)   | F22—C22—C21 | 119.4 (14)  |
| C16'—O15'—Cu1  | 125.0 (7)   | F21—C22—C21 | 111.1 (15)  |
| C19'—O15'—Cu1  | 124.8 (4)   | F23—C22—C21 | 114.9 (15)  |

|                |            |             |            |
|----------------|------------|-------------|------------|
| O15'—C16'—C17' | 101.2 (12) | C31—O31—Cu1 | 126.5 (13) |
| C18'—C17'—C16' | 98.9 (14)  | C31—O32—Ti1 | 137.8 (8)  |
| C17'—C18'—C19' | 99.1 (13)  | O31—C31—O32 | 130.6 (14) |
| O15'—C19'—C18' | 106.3 (7)  | O31—C31—C32 | 116.0 (13) |
| O3—Ti1—O2      | 94.16 (17) | O32—C31—C32 | 113.3 (11) |
| O3—Ti1—O1      | 98.30 (18) | F32—C32—F31 | 104.9 (16) |
| O2—Ti1—O1      | 95.71 (17) | F32—C32—F33 | 109.0 (16) |
| O3—Ti1—O32     | 167.8 (3)  | F31—C32—F33 | 104.5 (15) |
| O2—Ti1—O32     | 90.3 (3)   | F32—C32—C31 | 114.2 (14) |
| O1—Ti1—O32     | 92.5 (2)   | F31—C32—C31 | 110.1 (14) |
| O3—Ti1—O12     | 91.1 (3)   | F33—C32—C31 | 113.4 (15) |
| O2—Ti1—O12     | 167.6 (3)  | C41—O41—Cu1 | 132 (2)    |
| O1—Ti1—O12     | 94.6 (2)   | C41—O42—Ti2 | 136.7 (8)  |
| O32—Ti1—O12    | 82.4 (3)   | O41—C41—O42 | 128.6 (16) |
| O3—Ti1—O25     | 88.3 (4)   | O41—C41—C42 | 114.6 (15) |
| O2—Ti1—O25     | 88.5 (4)   | O42—C41—C42 | 116.6 (11) |
| O1—Ti1—O25     | 171.9 (3)  | F42—C42—F43 | 120.9 (15) |
| O32—Ti1—O25    | 80.5 (4)   | F42—C42—F41 | 92.4 (14)  |
| O12—Ti1—O25    | 80.4 (4)   | F43—C42—F41 | 102.5 (14) |
| O3—Ti1—Ti4     | 23.17 (12) | F42—C42—C41 | 112.4 (14) |
| O2—Ti1—Ti4     | 79.29 (12) | F43—C42—C41 | 119.5 (14) |
| O1—Ti1—Ti4     | 82.22 (12) | F41—C42—C41 | 101.6 (14) |
| O32—Ti1—Ti4    | 167.7 (2)  | C51—O52—Ti4 | 136.3 (8)  |
| O12—Ti1—Ti4    | 109.0 (2)  | O51—C51—O52 | 131.4 (16) |
| O25—Ti1—Ti4    | 105.5 (3)  | O51—C51—C52 | 114.8 (15) |
| O3—Ti1—Ti2     | 80.18 (13) | O52—C51—C52 | 113.7 (10) |
| O2—Ti1—Ti2     | 79.38 (13) | F52—C52—F53 | 120.7 (13) |
| O1—Ti1—Ti2     | 25.44 (11) | F52—C52—F51 | 103.8 (12) |
| O32—Ti1—Ti2    | 111.8 (2)  | F53—C52—F51 | 89.3 (13)  |
| O12—Ti1—Ti2    | 112.6 (2)  | F52—C52—C51 | 122.0 (12) |
| O25—Ti1—Ti2    | 162.5 (3)  | F53—C52—C51 | 110.6 (12) |
| Ti4—Ti1—Ti2    | 60.18 (6)  | F51—C52—C51 | 102.1 (13) |
| O3—Ti1—Ti3     | 79.20 (12) | C61—O62—Ti4 | 136.1 (7)  |
| O2—Ti1—Ti3     | 23.04 (11) | O61—C61—O62 | 131.4 (13) |
| O1—Ti1—Ti3     | 80.69 (12) | O61—C61—C62 | 114.5 (12) |
| O32—Ti1—Ti3    | 108.2 (2)  | O62—C61—C62 | 113.8 (10) |
| O12—Ti1—Ti3    | 168.4 (2)  | F62—C62—F63 | 106.7 (12) |
| O25—Ti1—Ti3    | 105.3 (3)  | F62—C62—F61 | 108.7 (12) |
| Ti4—Ti1—Ti3    | 60.08 (5)  | F63—C62—F61 | 108.7 (13) |
| Ti2—Ti1—Ti3    | 59.78 (6)  | F62—C62—C61 | 112.4 (12) |
| O1—Ti2—O42     | 93.3 (2)   | F63—C62—C61 | 111.3 (10) |

|             |            |             |            |
|-------------|------------|-------------|------------|
| O1—Ti2—O22  | 92.3 (2)   | F61—C62—C61 | 108.9 (11) |
| O42—Ti2—O22 | 83.3 (3)   | C71—O72—Ti3 | 137.1 (7)  |
| O1—Ti2—O35  | 170.2 (4)  | O71—C71—O72 | 128.2 (13) |
| O42—Ti2—O35 | 79.9 (5)   | O71—C71—C72 | 115.7 (12) |
| O22—Ti2—O35 | 79.9 (4)   | O72—C71—C72 | 115.7 (9)  |
| O1—Ti2—Ti3  | 81.45 (12) | F72—C72—F71 | 109.4 (13) |
| O42—Ti2—Ti3 | 108.5 (2)  | F72—C72—F73 | 108.5 (12) |
| O22—Ti2—Ti3 | 166.9 (3)  | F71—C72—F73 | 105.9 (13) |
| O35—Ti2—Ti3 | 107.4 (4)  | F72—C72—C71 | 111.8 (11) |
| O1—Ti2—Ti1  | 25.78 (11) | F71—C72—C71 | 110.1 (13) |
| O42—Ti2—Ti1 | 112.9 (2)  | F73—C72—C71 | 111.0 (11) |
| O22—Ti2—Ti1 | 110.4 (2)  | C81—O82—Ti3 | 138.0 (7)  |
| O35—Ti2—Ti1 | 163.9 (3)  | O81—C81—O82 | 130.3 (13) |
| Ti3—Ti2—Ti1 | 60.27 (6)  | O81—C81—C82 | 114.2 (12) |
| O1—Ti2—Ti4  | 82.07 (12) | O82—C81—C82 | 115.4 (10) |
| O42—Ti2—Ti4 | 168.1 (2)  | F82—C82—F83 | 114.5 (11) |
| O22—Ti2—Ti4 | 107.8 (2)  | F82—C82—F81 | 103.3 (10) |
| O35—Ti2—Ti4 | 105.9 (4)  | F83—C82—F81 | 97.8 (11)  |
| Ti3—Ti2—Ti4 | 60.09 (5)  | F82—C82—C81 | 116.8 (10) |
| Ti1—Ti2—Ti4 | 59.72 (6)  | F83—C82—C81 | 114.9 (11) |
| O2—Ti3—O72  | 166.8 (3)  | F81—C82—C81 | 106.4 (12) |
| O2—Ti3—O82  | 88.2 (3)   | C26—O25—C29 | 107.7 (11) |
| O72—Ti3—O82 | 83.7 (3)   | C26—O25—Ti1 | 129.7 (9)  |
| O2—Ti3—O55  | 92.8 (3)   | C29—O25—Ti1 | 118.8 (10) |
| O72—Ti3—O55 | 75.0 (3)   | O25—C26—C27 | 105.3 (11) |
| O82—Ti3—O55 | 74.9 (4)   | C28—C27—C26 | 105.1 (11) |
| O2—Ti3—Ti2  | 80.29 (13) | C27—C28—C29 | 106.9 (11) |
| O72—Ti3—Ti2 | 108.9 (2)  | O25—C29—C28 | 108.7 (12) |
| O82—Ti3—Ti2 | 166.2 (2)  | C36—O35—C39 | 107.4 (11) |
| O55—Ti3—Ti2 | 113.1 (3)  | C36—O35—Ti2 | 120.7 (10) |
| O2—Ti3—Ti4  | 79.58 (13) | C39—O35—Ti2 | 130.0 (10) |
| O72—Ti3—Ti4 | 113.0 (2)  | O35—C36—C37 | 107.5 (11) |
| O82—Ti3—Ti4 | 110.4 (2)  | C38—C37—C36 | 106.5 (11) |
| O55—Ti3—Ti4 | 170.4 (2)  | C37—C38—C39 | 107.9 (11) |
| Ti2—Ti3—Ti4 | 60.08 (6)  | O35—C39—C38 | 108.2 (11) |
| O2—Ti3—Ti1  | 23.91 (12) | C46—O45—C49 | 111.3 (9)  |
| O72—Ti3—Ti1 | 168.4 (2)  | C46—O45—Ti4 | 118.5 (18) |
| O82—Ti3—Ti1 | 107.1 (2)  | C49—O45—Ti4 | 117.7 (9)  |
| O55—Ti3—Ti1 | 111.5 (3)  | O45—C46—C47 | 102.6 (11) |
| Ti2—Ti3—Ti1 | 59.94 (6)  | C48—C47—C46 | 103.3 (14) |
| Ti4—Ti3—Ti1 | 59.61 (6)  | C47—C48—C49 | 104.0 (13) |

|             |             |                |            |
|-------------|-------------|----------------|------------|
| O3—Ti4—O52  | 89.6 (3)    | O45—C49—C48    | 102.3 (13) |
| O3—Ti4—O62  | 168.8 (3)   | C46'—O45'—C49' | 111.0 (10) |
| O52—Ti4—O62 | 82.8 (3)    | O45'—C46'—C47' | 103.3 (11) |
| O3—Ti4—O45  | 81.5 (4)    | C48'—C47'—C46' | 105.8 (15) |
| O52—Ti4—O45 | 93.4 (4)    | C47'—C48'—C49' | 104.8 (13) |
| O62—Ti4—O45 | 90.8 (4)    | O45'—C49'—C48' | 105.3 (13) |
| O3—Ti4—Ti1  | 23.33 (12)  | C59—O55—C56    | 105.4 (11) |
| O52—Ti4—Ti1 | 108.7 (3)   | C59—O55—Ti3    | 95.3 (7)   |
| O62—Ti4—Ti1 | 167.4 (3)   | C56—O55—Ti3    | 147.6 (16) |
| O45—Ti4—Ti1 | 93.7 (4)    | O55—C56—C57    | 104.1 (13) |
| O3—Ti4—Ti2  | 80.25 (13)  | C58—C57—C56    | 103.2 (15) |
| O52—Ti4—Ti2 | 168.4 (3)   | C57—C58—C59    | 98.6 (15)  |
| O62—Ti4—Ti2 | 108.1 (3)   | O55—C59—C58    | 105.6 (13) |
| O45—Ti4—Ti2 | 90.7 (4)    | C59'—O55'—C56' | 104.1 (10) |
| Ti1—Ti4—Ti2 | 60.10 (5)   | O55'—C56'—C57' | 105.3 (13) |
| O3—Ti4—Ti3  | 79.56 (13)  | C58'—C57'—C56' | 101.6 (16) |
| O52—Ti4—Ti3 | 113.0 (2)   | C57'—C58'—C59' | 100.2 (16) |
| O62—Ti4—Ti3 | 111.0 (2)   | O55'—C59'—C58' | 108.0 (12) |
| O45—Ti4—Ti3 | 147.1 (4)   | C69—O65—C66    | 103.5 (14) |
| Ti1—Ti4—Ti3 | 60.31 (6)   | O65—C66—C67    | 107.2 (17) |
| Ti2—Ti4—Ti3 | 59.83 (6)   | C68—C67—C66    | 112 (2)    |
| Ti2—O1—Ti1  | 128.8 (2)   | C67—C68—C69    | 103.4 (19) |
| Ti2—O1—Cu1  | 116.10 (17) | O65—C69—C68    | 112.6 (17) |

## References

**SADABS:** L. Krause, R. Herbst-Irmer, G.M, Sheldrick and D. Stalke. *J. Appl. Cryst.*, 2015, **48**, 3-10.

**SHELXT:** G.M. Sheldrick, *Acta Cryst*, 2015, **A71**, 3-8.

**SHELXL (since 2008):** G.M. Sheldrick, *Acta Cryst.* 2015, **C71**, 3-8.

**Mercury:** C. F. Macrae, P. R. Edgington, P. McCabe, E. Pidcock, G. P. Shields, R. Taylor, M. Towler and J. van der Streek, *J. Appl. Crystallogr.*, 2006, **39**, 453-457.

**PublCIF:** S.P. Westrip, *J. Appl. Cryst.*, 2010, **43**, 920-925.
